# Supplementary material for: Muscle weakness and mitochondrial stress occur before metastasis in a novel mouse model of ovarian cancer cachexia
Source: PubMed Central journal article supplement (PMC11030380; doi:10.1101/2024.04.08.588639), 2024-04-08
Supplement: NIHPP2024.04.08.588639v1-supplement-1.pdf [file NIHPP2024.04.08.588639v1-supplement-1.pdf]

998

## 999 **Supplemental Figure Legends**

1000

1001 **SFigure 1. Weekly body weights and age of EOC injections throughout study.** This study used  
1002 two mice per “n” from separate cohorts to obtain enough tissue to complete all experiments.  
1003 Weekly body weights were measured in mice from cohort 1 (A, n =12) and cohort 2 (B, n =12).  
1004 Results represent mean  $\pm$  SD. All data was analyzed using a one-way ANOVA and followed by a  
1005 two-stage step-up method of Benjamini, Krieger and Yukutieli multiple comparisons test.  
1006 C57BL/6J female mice ~75 days post PBS injection as controls (CTRL); C57BL/6J female mice  
1007 ~45 days post ovarian cancer injection (45 Days); C57BL/6J female mice ~75 days post ovarian  
1008 cancer injection (75 Days); C57BL/6J female mice ~90 days post ovarian cancer injection (90  
1009 Days).

1010

1011 **SFigure 2. Positive and negative control experiments of eMHC protocol.** Tibialis anterior  
1012 muscle from D2.mdx mice were used as a positive control to validate the eMHC histology  
1013 technique. Technical replicates of the same tissue were incubated with no eMHC antibody (left)  
1014 and with 16 $\mu$ g/mL of eMHC primary antibody (right).

1015

1016 **SFigure 3. Muscle-specific evaluation of electron transport chain (ETC) complex subunit**  
1017 **markers in EOC injected tibialis anterior and diaphragm skeletal muscle.** Protein content of  
1018 ETC subunits was quantified in the tibialis anterior (A, n = 12) and diaphragm (B, n = 12) Results  
1019 represent mean  $\pm$  SD. All data was analyzed using a one-way ANOVA or Kruskal-Wallis test  
1020 when data did not fit normality. All ANOVAs were followed by a two-stage step-up method of  
1021 Benjamini, Krieger and Yukutieli multiple comparisons test. C57BL/6J female mice ~75 days post  
1022 PBS injection as controls (CTRL); C57BL/6J female mice ~45 days post ovarian cancer injection  
1023 (45 Days); C57BL/6J female mice ~75 days post ovarian cancer injection (75 Days); C57BL/6J  
1024 female mice ~90 days post ovarian cancer injection (90 Days).

1025

1026 **SFigure 4. Maximum ADP-stimulated respiration, creatine sensitivity ratios and**  
1027 **mitochondrial creatine kinase (mtCK) protein content in tibialis anterior and diaphragm**  
1028 **muscle of EOC injected mice.** Maximum ADP-stimulated mitochondrial respiration was  
1029 evaluated in the tibialis anterior and diaphragm both in the presence and absence of creatine (A-  
1030 D, n = 9-12). A ratio of +Creatine/-Creatine respiration in the tibialis anterior and diaphragm  
1031 muscle was generated at 100 $\mu$ M and 500 $\mu$ M (apparent Km of mtCK) as an index of creatine  
1032 sensitivity (E & F, n = 9-12). mtCK protein content was also quantified in both muscles (n = 12).  
1033 Results represent mean  $\pm$  SD.  $\lambda$   $p < 0.05$  75 Day vs 90 Day;  $\delta$   $p < 0.05$  Control versus 90 Day.  
1034 Figures A-D, G and H were analyzed using a one-way ANOVA or Kruskal-Wallis test when data  
1035 did not fit normality. Figures E and H were analyzed using a two-way ANOVA (main effect shown  
1036 only). All ANOVAs were followed by a two-stage step-up method of Benjamini, Krieger and  
1037 Yukutieli multiple comparisons test. C57BL/6J female mice ~75 days post PBS injection as  
1038 controls (CTRL); C57BL/6J female mice ~45 days post ovarian cancer injection (45 Days);

1039 C57BL/6J female mice ~75 days post ovarian cancer injection (75 Days); C57BL/6J female mice  
1040 ~90 days post ovarian cancer injection (90 Days).

1041  
1042 **SFigure 5. Fatty acid-supported mitochondrial respiration in tibialis anterior and**  
1043 **diaphragm of EOC injected mice.** State II (L-carnitine + palmitoyl coenzyme A + malate;  
1044 absence of ADP) mitochondrial respiration was evaluated in the tibialis anterior and diaphragm  
1045 muscle in the presence of 20mM creatine (A & C, n = 10-12). State III (5mM ADP) mitochondrial  
1046 respiration was also evaluated in TA and diaphragm muscle (B & D, n =10-12) Results represent  
1047 mean  $\pm$  SD. All data was analyzed using a one-way ANOVA or Kruskal-Wallis test when data did  
1048 not fit normality. All ANOVAS were followed by a two-stage step-up method of Benjamini,  
1049 Krieger and Yukutieli multiple comparisons test. C57BL/6J female mice ~75 days post PBS  
1050 injection as controls (CTRL); C57BL/6J female mice ~45 days post ovarian cancer injection (45  
1051 Days); C57BL/6J female mice ~75 days post ovarian cancer injection (75 Days); C57BL/6J female  
1052 mice ~90 days post ovarian cancer injection (90 Days).

1053  
1054 **SFigure 6. Multiple substrate evaluation of oxygen consumption in tibialis anterior and**  
1055 **diaphragm of EOC injected mice.** Oxygen consumption was evaluated in tibialis anterior  
1056 bundles using succinate both in the presence and absence of creatine (A & B). Glutamate-  
1057 supported respiration was also evaluated in the presence and absence of creatine (C & D). State. II  
1058 (absence of ADP) was also evaluated in the presence and absence of creatine (E & F). This was  
1059 repeated in the diaphragm (G-L). Results represent mean  $\pm$  SD. n = 9-12. Lettering denotes statical  
1060 significance when different from each other ( $p < 0.05$ ). All data was analyzed using a one-way  
1061 ANOVA or Kruskal-Wallis test when data did not fit normality. All ANOVAS were followed by  
1062 a two-stage step-up method of Benjamini, Krieger and Yukutieli multiple comparisons test.  
1063 C57BL/6J female mice ~75 days post PBS injection as controls (CTRL); C57BL/6J female mice  
1064 ~45 days post ovarian cancer injection (45 Days); C57BL/6J female mice ~75 days post ovarian  
1065 cancer injection (75 Days); C57BL/6J female mice ~90 days post ovarian cancer injection (90  
1066 Days).

1067  
1068 **SFigure 7. Log transformed data for analysis in tibialis anterior and diaphragm that did not**  
1069 **fit a normal distribution.** Data that did not fit normality were log transformed and then analyzed  
1070 using standard 2-way ANOVAs. Results represent mean  $\pm$  SD. n = 9-12.  $\alpha p < 0.05$  Control versus  
1071 45 Day;  $\beta p < 0.05$  Control versus 75 Day;  $\delta p < 0.05$  Control versus 90 Day;  $\theta p < 0.05$  45 Day  
1072 versus 90 Day;  $\lambda p < 0.05$  75 Day vs 90 Day. All Data were analyzed using a two-way ANOVA.  
1073 All ANOVAS were followed by a two-stage step-up method of Benjamini, Krieger and Yukutieli  
1074 multiple comparisons test. C57BL/6J female mice ~75 days post PBS injection as controls  
1075 (CTRL); C57BL/6J female mice ~45 days post ovarian cancer injection (45 Days); C57BL/6J  
1076 female mice ~75 days post ovarian cancer injection (75 Days); C57BL/6J female mice ~90 days  
1077 post ovarian cancer injection (90 Days).

1078  
1079  
1080  
1081  
1082  
1083  
1084

**STable 1. List of primers used for qtPCR.**

1085

| Oligo name              | Oligo sequence (5' to 3') |
|-------------------------|---------------------------|
| m-actb Fwd              | CATTGCTGACAGGATGCAGAAGG   |
| m-actb Rev              | TGCTGGAAGGTGGACAGTGAGG    |
| m-TNFa Fw               | AGAATGAGGCTGGATAAGAT      |
| m-TNFa Rev              | GAGGCAACAAGGTAGAGA        |
| m-IL6 Fw                | ACAGAAGGAGTGGCTAAG        |
| m-IL6 Rev               | AGAGAACAACATAAGTCAGATAC   |
| m-Murfl Fw              | ACCTGCTGGTGGAAAACATC      |
| m-Murfl Rev             | AGGAGCAAGTAGGCACCTCA      |
| m-Atrogin1 Fw           | AGCGCTTCTTGGATGAGAAA      |
| m-Atrogin1 Rev          | ACGTCGTAGTTCAGGCTGCT      |
| m-RyR1 Fw               | TGCTCAAGGAACAGCTGAAG      |
| m-RyR1 Rev              | GGGCTCGAACTGACAGAGAC      |
| m-Serca 1 (Atp2a1) -Fw  | ACACAGACCCTGTCCCTGAC      |
| m-Serca 1 (Atp2a1) -Rev | TGCAGTGGAGTCTTGTCTG       |
| m-Serca 2 (Atp2a2) -Fw  | TACTGACCCTGTCCCTGACC      |
| m-Serca 2 (Atp2a2) -Rev | CACCACCACTCCCATAGC        |

1086

1087

1088

# SFigure 1

A

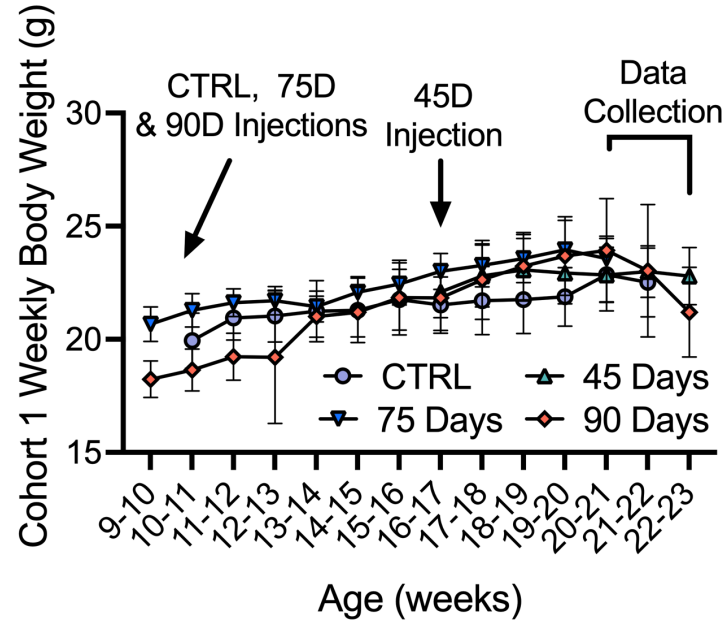

B

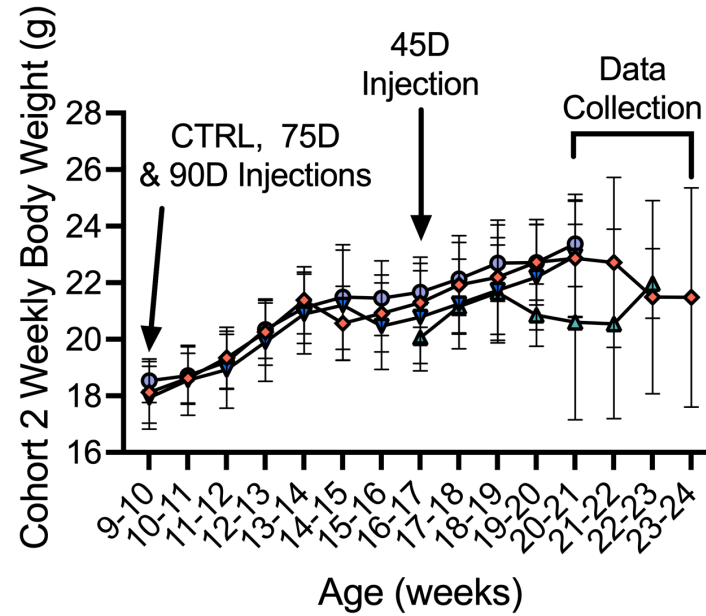

**SFigure 1. Weekly body weights and age of EOC injections throughout study.** This study used two mice per “n” from separate cohorts to obtain enough tissue to complete all experiments. Weekly body weights were measured in mice from cohort 1 (A, n =12) and cohort 2 (B, n =12). Results represent mean  $\pm$  SD. All data was analyzed using a one-way ANOVA and followed by a two-stage step-up method of Benjamini, Krieger and Yukutieli multiple comparisons test. C57BL/6J female mice ~75 days post PBS injection as controls (CTRL); C57BL/6J female mice ~45 days post ovarian cancer injection (45 Days); C57BL/6J female mice ~75 days post ovarian cancer injection (75 Days); C57BL/6J female mice ~90 days post ovarian cancer injection (90 Days).

# SFigure 2

D2.mdx: 0 $\mu$ g/mL anti-eMHC Antibody

D2.mdx: 16 $\mu$ g/mL anti-eMHC Antibody

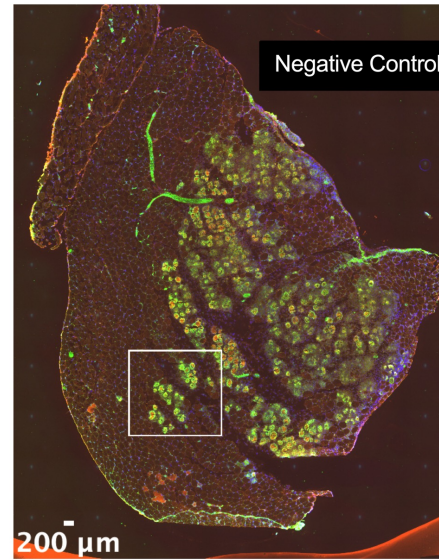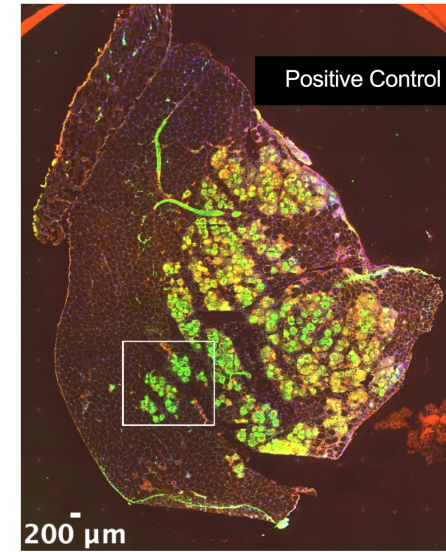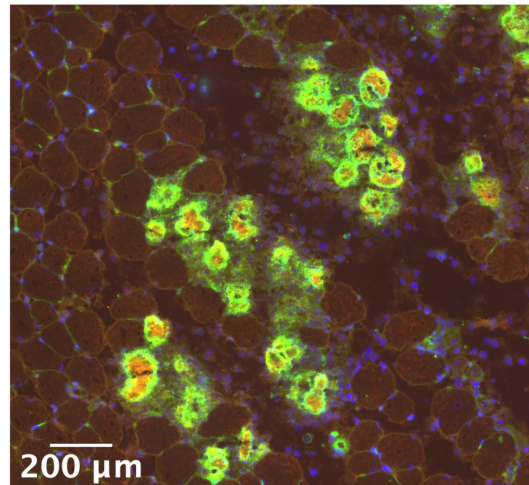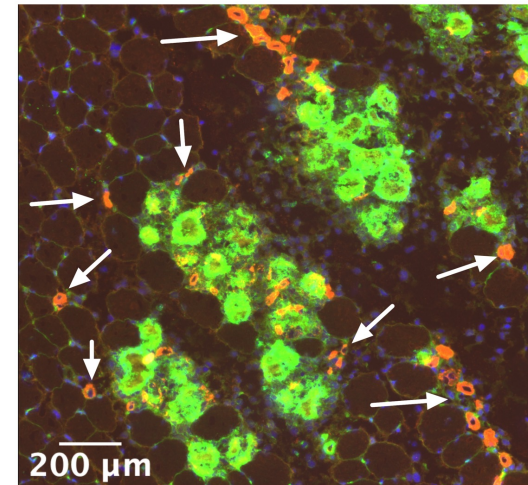

**SFigure 2. Positive and negative control experiments of eMHC protocol.** Tibialis anterior muscle from D2.mdx mice were used as a positive control to validate the eMHC histology technique. Technical replicates of the same tissue were incubated with no eMHC antibody (left) and with 16 $\mu$ g/mL of eMHC primary antibody (right).



# SFigure 3

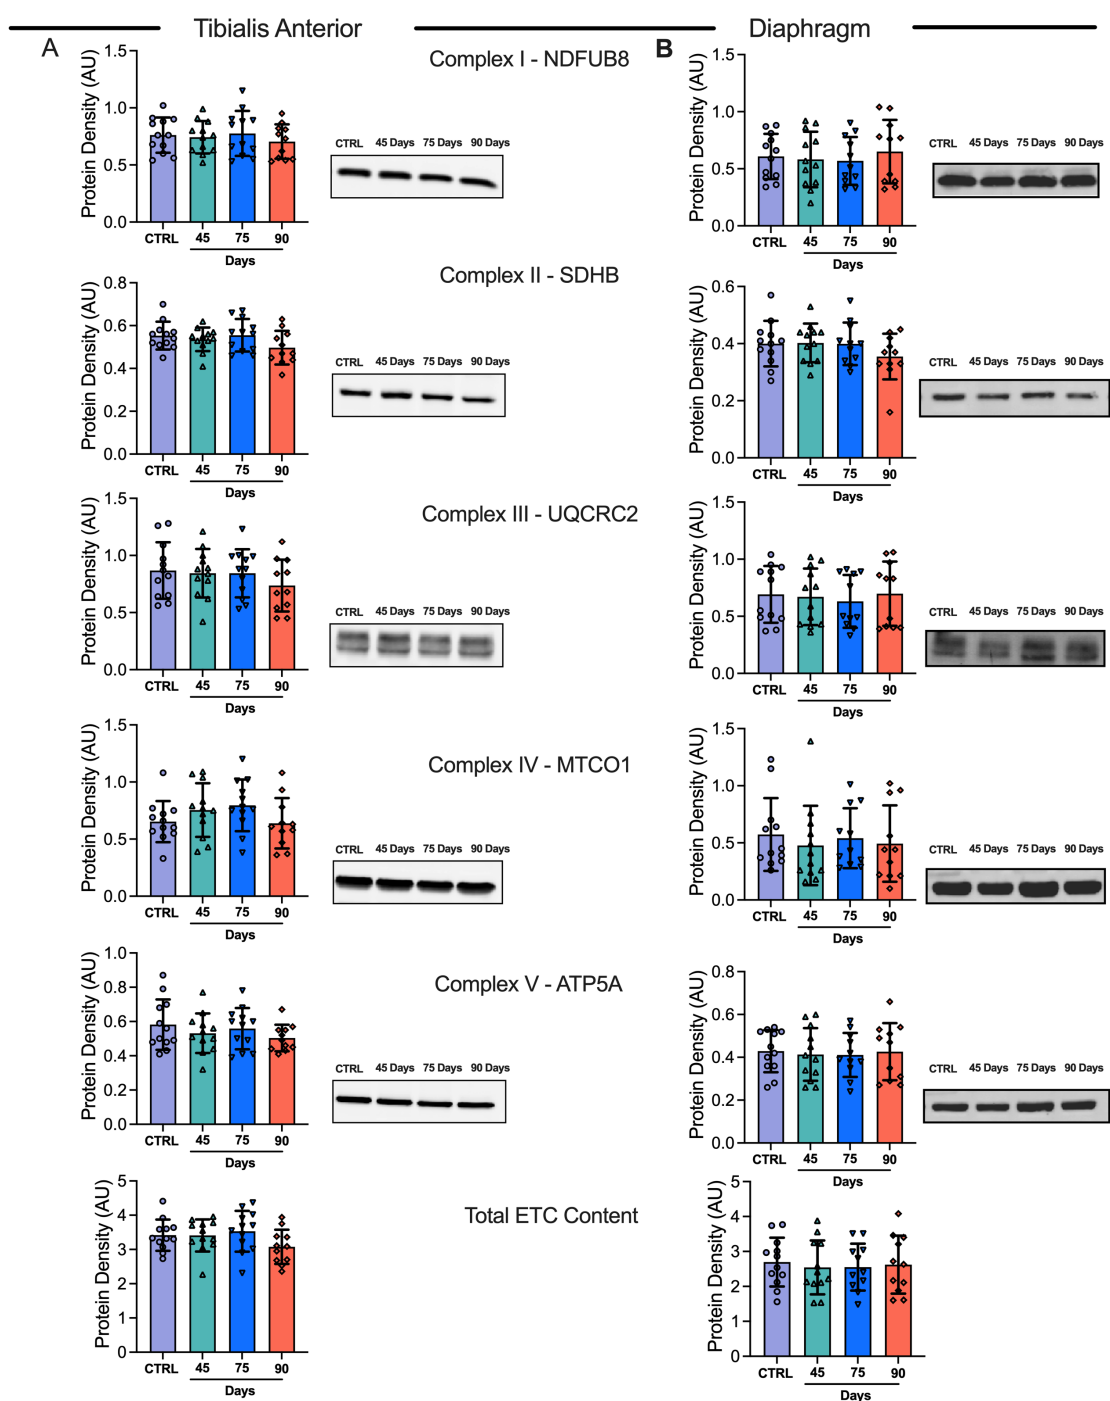

**SFigure 3. Muscle-specific evaluation of electron transport chain (ETC) complex subunit markers in EOC injected tibialis anterior and diaphragm skeletal muscle.** Protein content of ETC subunits was quantified in the tibialis anterior (**A**, n = 12) and diaphragm (**B**, n = 12) Results represent mean  $\pm$  SD. All data was analyzed using a one-way ANOVA or Kruskal-Wallis test when data did not fit normality. All ANOVAs were followed by a two-stage step-up method of Benjamini, Krieger and Yukutieli multiple comparisons test. C57BL/6J female mice ~75 days post PBS injection as controls (CTRL); C57BL/6J female mice ~45 days post ovarian cancer injection (45 Days); C57BL/6J female mice ~75 days post ovarian cancer injection (75 Days); C57BL/6J female mice ~90 days post ovarian cancer injection (90 Days).

# SFigure 4

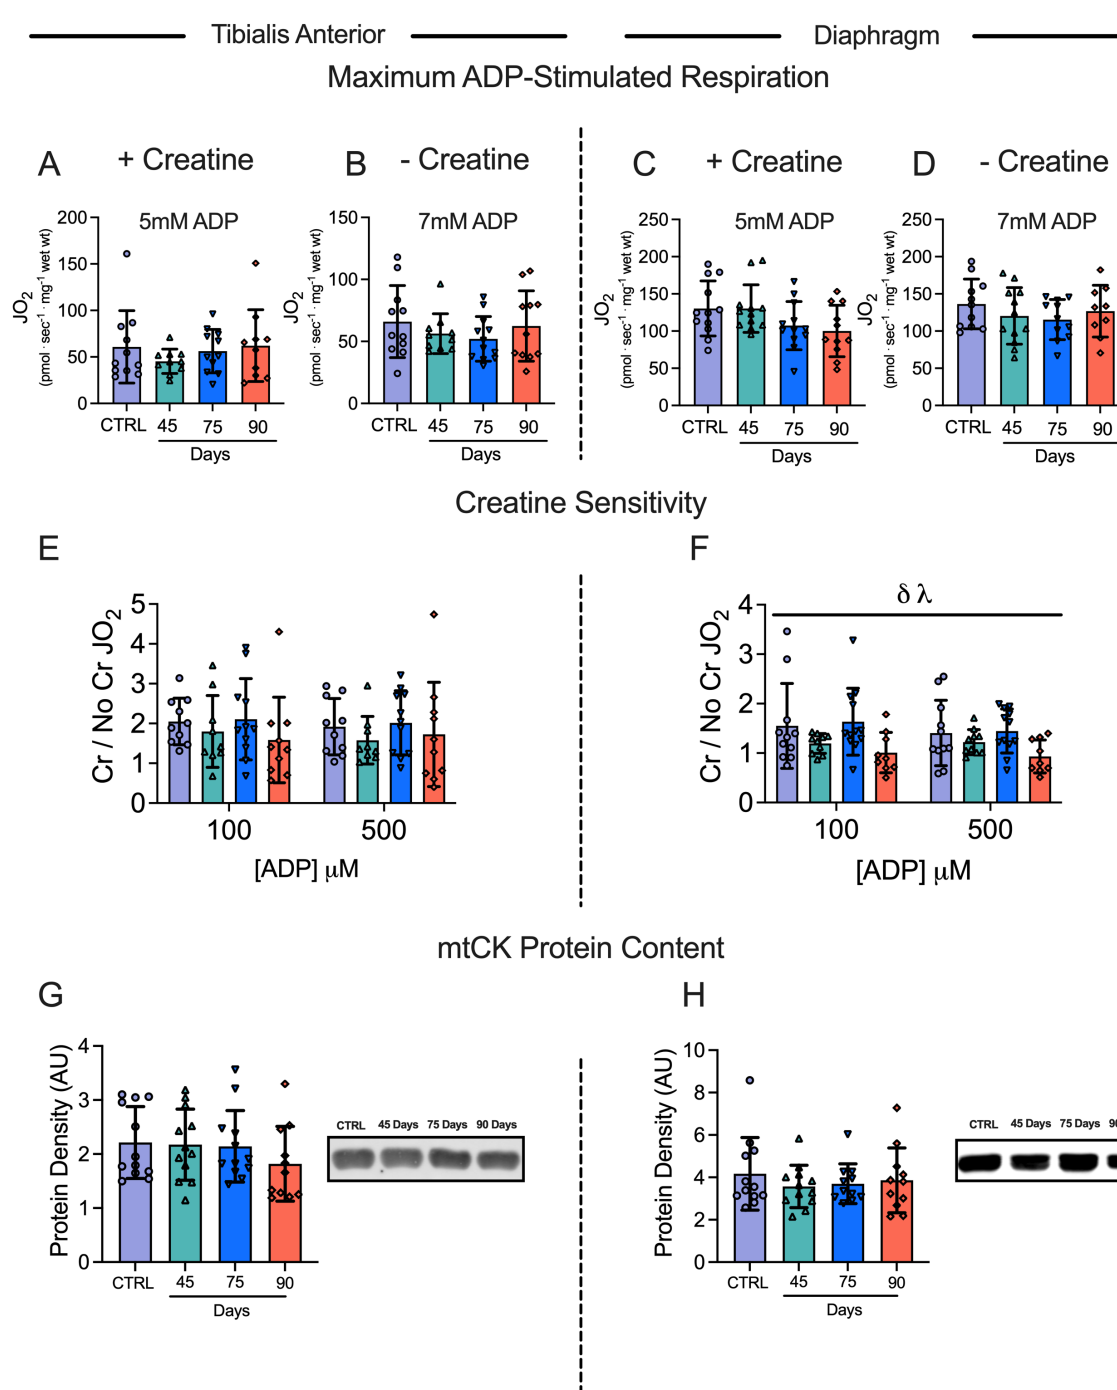

**SFigure 4. Maximum ADP-stimulated respiration, creatine sensitivity ratios and mitochondrial creatine kinase (mtCK) protein content in tibialis anterior and diaphragm muscle of EOC injected mice.** Maximum ADP-stimulated mitochondrial respiration was evaluated in the tibialis anterior and diaphragm both in the presence and absence of creatine (**A-D**,  $n = 9-12$ ). A ratio of +Creatine/-Creatine respiration in the tibialis anterior and diaphragm muscle was generated at 100 $\mu$ M and 500 $\mu$ M (apparent  $K_m$  of mtCK) as an index of creatine sensitivity (**E & F**,  $n = 9-12$ ). mtCK protein content was also quantified in both muscles ( $n = 12$ ). Results represent mean  $\pm$  SD.  $\lambda p < 0.05$  75 Day vs 90 Day;  $\delta p < 0.05$  Control versus 90 Day. Figures A-D, G and H were analyzed using a one-way ANOVA or Kruskal-Wallis test when data did not fit normality. Figures E and H were analyzed using a two-way ANOVA (main effect shown only). All ANOVAs were followed by a two-stage step-up method of Benjamini, Krieger and Yukutieli multiple comparisons test. C57BL/6J female mice  $\sim$ 75 days post PBS injection as controls (CTRL); C57BL/6J female mice  $\sim$ 45 days post ovarian cancer injection (45 Days); C57BL/6J female mice  $\sim$ 75 days post ovarian cancer injection (75 Days); C57BL/6J female mice  $\sim$ 90 days post ovarian cancer injection (90 Days).

# SFigure 5

L-carnitine + palmitoyl coenzyme A + malate

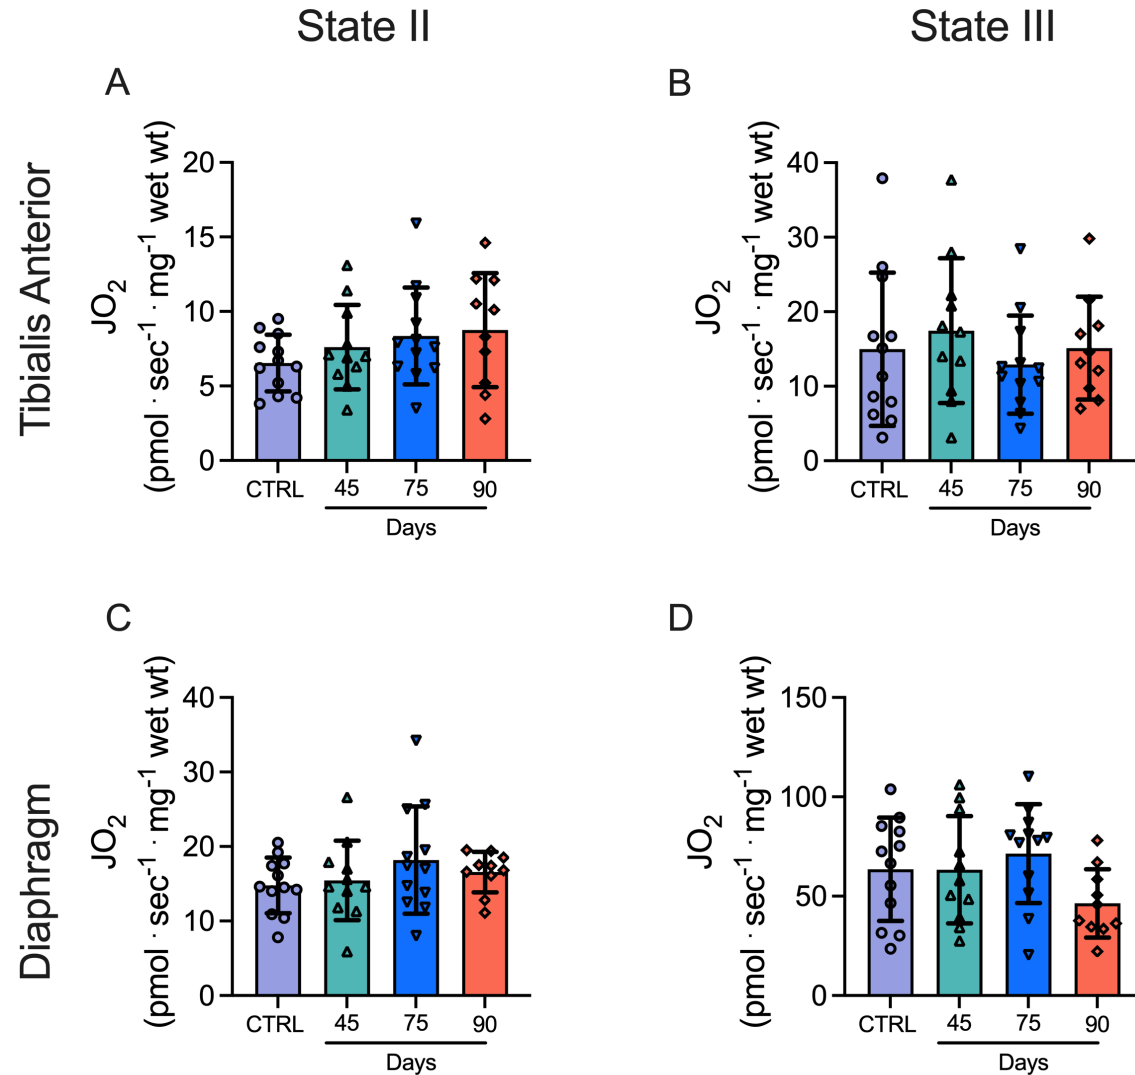

**SFigure 5. Fatty acid-supported mitochondrial respiration in tibialis anterior and diaphragm of EOC injected mice.** State II (L-carnitine + palmitoyl coenzyme A + malate; absence of ADP) mitochondrial respiration was evaluated in the tibialis anterior and diaphragm muscle in the presence of 20mM creatine (A & C, n = 10-12). State III (5mM ADP) mitochondrial respiration was also evaluated in TA and diaphragm muscle (B & D, n = 10-12). Results represent mean ± SD. All data was analyzed using a one-way ANOVA or Kruskal-Wallis test when data did not fit normality. All ANOVAS were followed by a two-stage step-up method of Benjamini, Krieger and Yukutieli multiple comparisons test. C57BL/6J female mice ~75 days post PBS injection as controls (CTRL); C57BL/6J female mice ~45 days post ovarian cancer injection (45 Days); C57BL/6J female mice ~75 days post ovarian cancer injection (75 Days); C57BL/6J female mice ~90 days post ovarian cancer injection (90 Days).



# SFigure 6

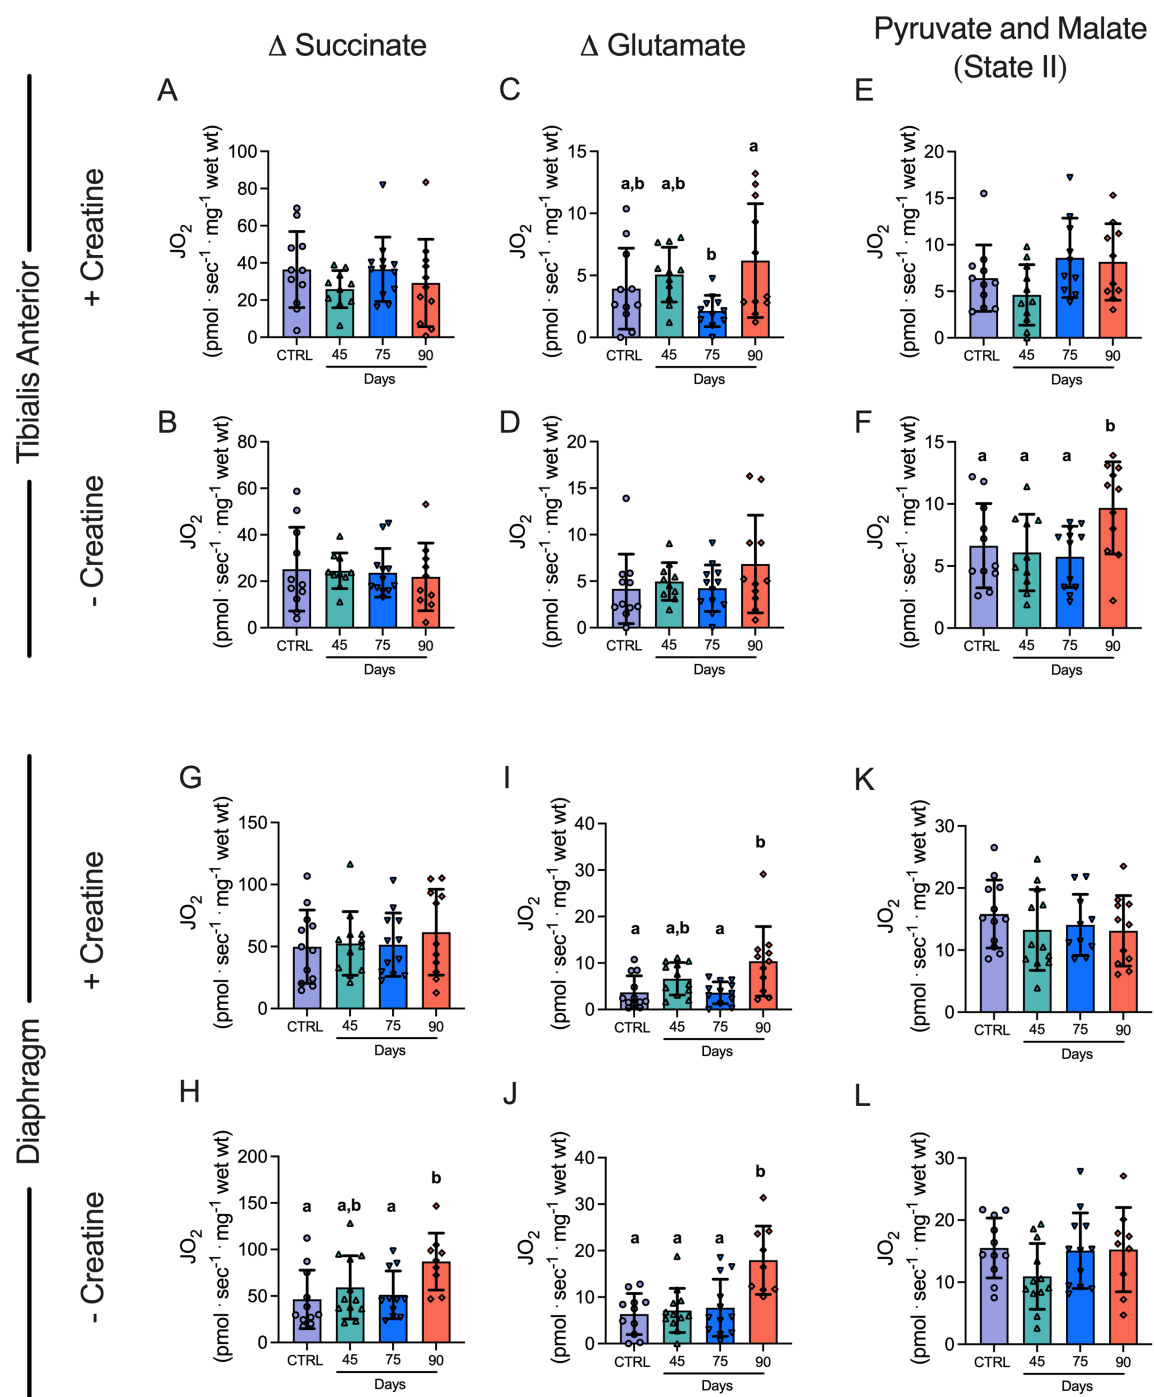

**SFigure 6. Multiple substrate evaluation of oxygen consumption in tibialis anterior and diaphragm of EOC injected mice.** Oxygen consumption was evaluated in tibialis anterior bundles using succinate both in the presence and absence of creatine (**A & B**). Glutamate-supported respiration was also evaluated in the presence and absence of creatine (**C & D**). State. II (absence of ADP) was also evaluated in the presence and absence of creatine (**E & F**). This was repeated in the diaphragm (**G-L**). Results represent mean ± SD. n = 9-12. Lettering denotes statistical significance when different from each other ( $p < 0.05$ ). All data was analyzed using a one-way ANOVA or Kruskal-Wallis test when data did not fit normality. All ANOVAs were followed by a two-stage step-up method of Benjamini, Krieger and Yukutieli multiple comparisons test. C57BL/6J female mice ~75 days post PBS injection as controls (CTRL); C57BL/6J female mice ~45 days post ovarian cancer injection (45 Days); C57BL/6J female mice ~75 days post ovarian cancer injection (75 Days); C57BL/6J female mice ~90 days post ovarian cancer injection (90 Days).

# SFigure 7

## Mitochondrial Respiration

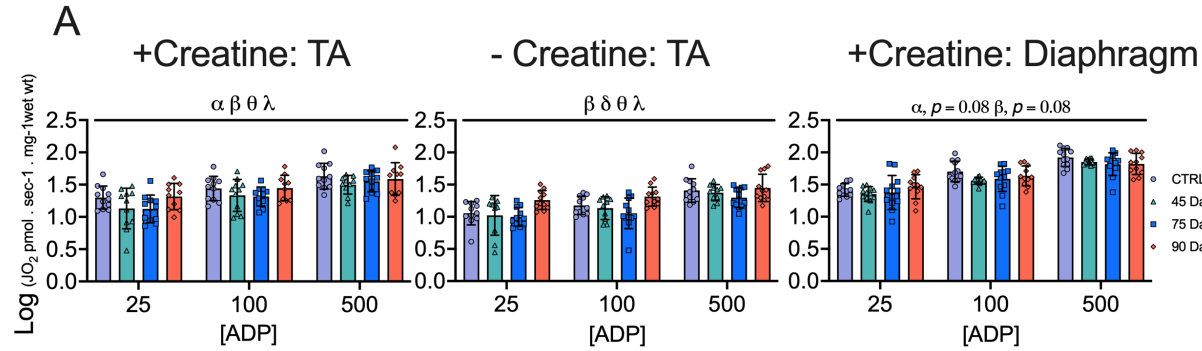

## Tibialis Anterior: $\text{H}_2\text{O}_2$ emission

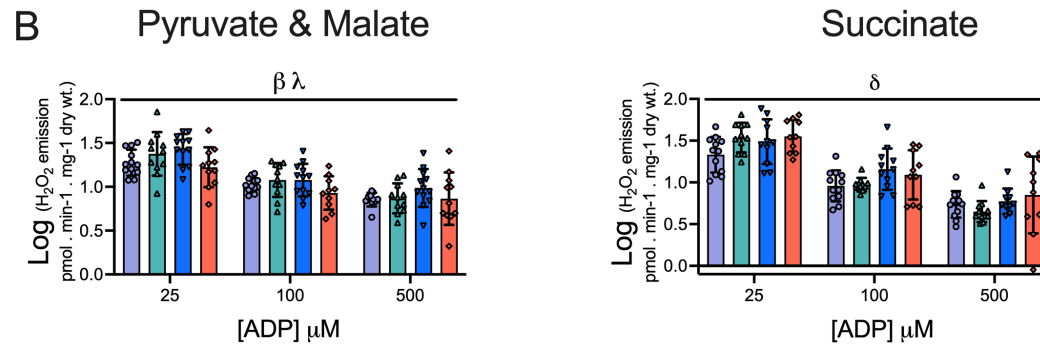

## Diaphragm: $\text{H}_2\text{O}_2$ emission

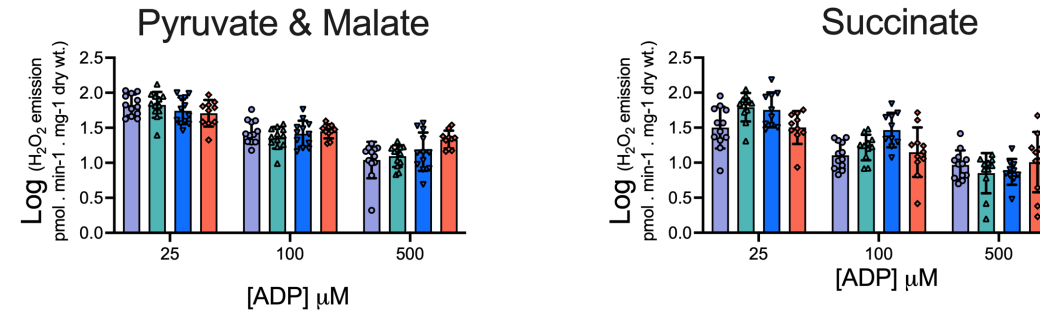

**SFigure 7. Log transformed data for analysis in tibialis anterior and diaphragm that did not fit a normal distribution.** Data that did not fit normality were log transformed and then analyzed using standard 2-way ANOVAs. Results represent mean  $\pm$  SD. n = 9-12.  $\alpha$   $p < 0.05$  Control versus 45 Day;  $\beta$   $p < 0.05$  Control versus 75 Day;  $\delta$   $p < 0.05$  Control versus 90 Day;  $\theta$   $p < 0.05$  45 Day versus 90 Day;  $\lambda$   $p < 0.05$  75 Day vs 90 Day. All Data were analyzed using a two-way ANOVA. All ANOVAs were followed by a two-stage step-up method of Benjamini, Krieger and Yukutieli multiple comparisons test. C57BL/6J female mice ~75 days post PBS injection as controls (CTRL); C57BL/6J female mice ~45 days post ovarian cancer injection (45 Days); C57BL/6J female mice ~75 days post ovarian cancer injection (75 Days); C57BL/6J female mice ~90 days post ovarian cancer injection (90 Days).

# STable 1

| Oligo name              | Oligo sequence (5' to 3') |
|-------------------------|---------------------------|
| m-actb Fwd              | CATTGCTGACAGGATGCAGAAGG   |
| m-actb Rev              | TGCTGGAAGGTGGACAGTGAGG    |
| m-TNFa Fw               | AGAATGAGGCTGGATAAGAT      |
| m-TNFa Rev              | GAGGCAACAAGGTAGAGA        |
| m-IL6 Fw                | ACAGAAGGAGTGGCTAAG        |
| m-IL6 Rev               | AGAGAACAACATAAGTCAGATAC   |
| m-Murf1 Fw              | ACCTGCTGGTGGAAAACATC      |
| m-Murf1 Rev             | AGGAGCAAGTAGGCACCTCA      |
| m-Atrogin1 Fw           | AGCGCTTCTTGGATGAGAAA      |
| m-Atrogin1 Rev          | ACGTCGTAGTTCAGGCTGCT      |
| m-RyR1 Fw               | TGCTCAAGGAACAGCTGAAG      |
| m-RyR1 Rev              | GGGCTCGAACTGACAGAGAC      |
| m-Serca 1 (Atp2a1) -Fw  | ACACAGACCCTGTCCCTGAC      |
| m-Serca 1 (Atp2a1) -Rev | TGCAGTGGAGTCTTGTCCCTG     |
| m-Serca 2 (Atp2a2) -Fw  | TACTGACCCTGTCCCTGACC      |
| m-Serca 2 (Atp2a2) -Rev | CACCACCACTCCCATAGC        |

**STable 1. List of primers used for qtPCR.**
